# Supplementary material for: Boosting the fast electrochemical kinetics of Na4Fe3(PO4)2(P2O7) via a 3D graphene network as a cathode material for potassium-ion batteries
Source: Royal Society of Chemistry journal article supplement (doi:10.1039/d3nj00553d), 2023-01-01
Supplement: d3nj00553d1.pdf [file d3nj00553d1.pdf]

## Supporting Information

# Boosting Fast Electrochemical Kinetics of $\text{Na}_4\text{Fe}_3(\text{PO}_4)_2(\text{P}_2\text{O}_7)$ via 3D Graphene Network as a Cathode Material for Potassium-ion Batteries

*Kangsheng Shi, Wensheng Yang, Qiaodan Wu, Xingke Yang, Ruiya Zhao, Ziqiang She,  
Quan Xie, Yunjun Ruan\**

*Institute of Advanced Optoelectronic Materials and Technology, College of Big Data  
and Information Engineering, Guizhou University, Guiyang 550025, China.*

*\*Corresponding author E-mail: [yjruan@gzu.edu.cn](mailto:yjruan@gzu.edu.cn) (Yunjun Ruan)*

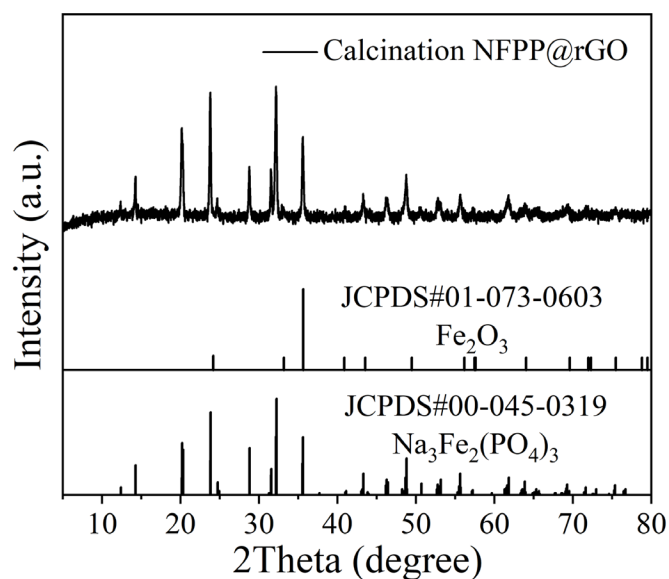

**Fig. S1.** XRD pattern of NFPP@rGO calcined at 700 °C in the air.

The equation of NFPP@rGO 's pyrolysis reaction is as follows:

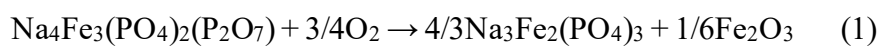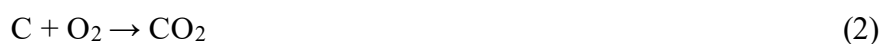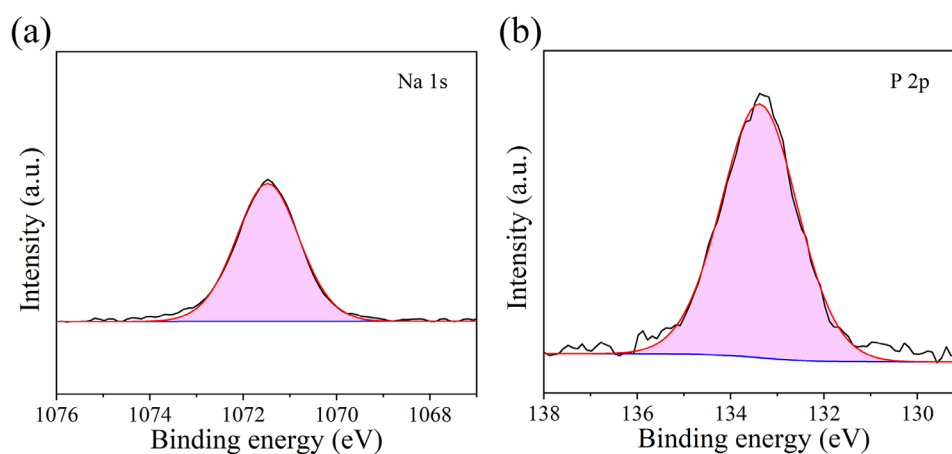

**Fig. S2.** XPS spectra of (a) Na 1s and (b) P 2p.

**Table S1.** Electrochemical performance comparison of potassium ion batteries cathode.

| Materials                                                                | Capacity                                        | Capacity retention                        | Reference |
|--------------------------------------------------------------------------|-------------------------------------------------|-------------------------------------------|-----------|
| $\text{Na}_4\text{Fe}_3(\text{PO}_4)_2(\text{P}_2\text{O}_7)\text{@rGO}$ | 119.1 mAh g <sup>-1</sup> at 0.1 C              | 82.1% (500 cycles at 2 C)                 | This work |
| $\text{K}_4[\text{Mn}_2\text{Fe}](\text{PO}_4)_2(\text{P}_2\text{O}_7)$  | 110 mAh g <sup>-1</sup> at 0.05 C               | 83% (300 cycles at 1/3 C)                 | 1         |
| $\text{KFePO}_4/\text{C}$                                                | 47 mAh g <sup>-1</sup> at 10 mA g <sup>-1</sup> | 84% (50 cycles at 10 mA g <sup>-1</sup> ) | 2         |
| $\text{KVOPO}_4$                                                         | 115 mAh g <sup>-1</sup> at 0.2 C                | 86.8% (100 cycles at 0.5 C)               | 3         |
| $\text{KVP}_2\text{O}_7$                                                 | 60 mAh g <sup>-1</sup> at 0.25 C                | 85% (100 cycles at 0.25 C)                | 4         |
| $\text{KTiPO}_4\text{@C}$                                                | 102 mAh g <sup>-1</sup> at 5 mA g <sup>-1</sup> | 80% (50 cycles at 5 mA g <sup>-1</sup> )  | 5         |
| $\text{KTiPO}_4/\text{F/C}$                                              | 94 mAh g <sup>-1</sup> at 0.05 C                | 97% (100 cycles at 2 C)                   | 6         |

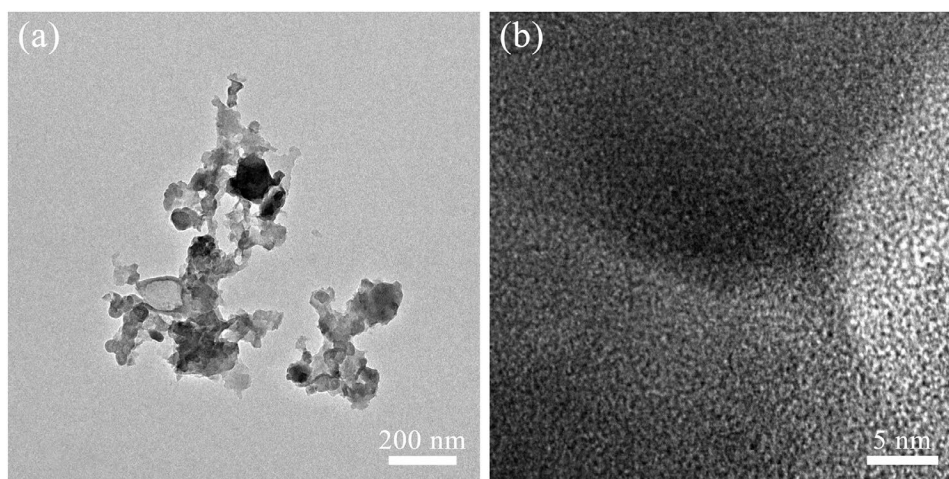**Fig. S3.** (a) TEM and (b) HRTEM images of NFPP@rGO after cycles.

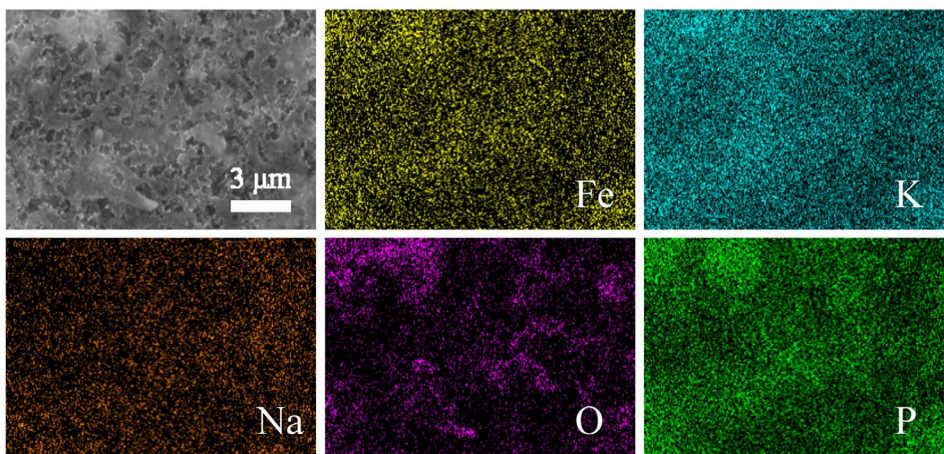

**Fig. S4.** EDS elemental mapping of NFPP@rGO after cycles.

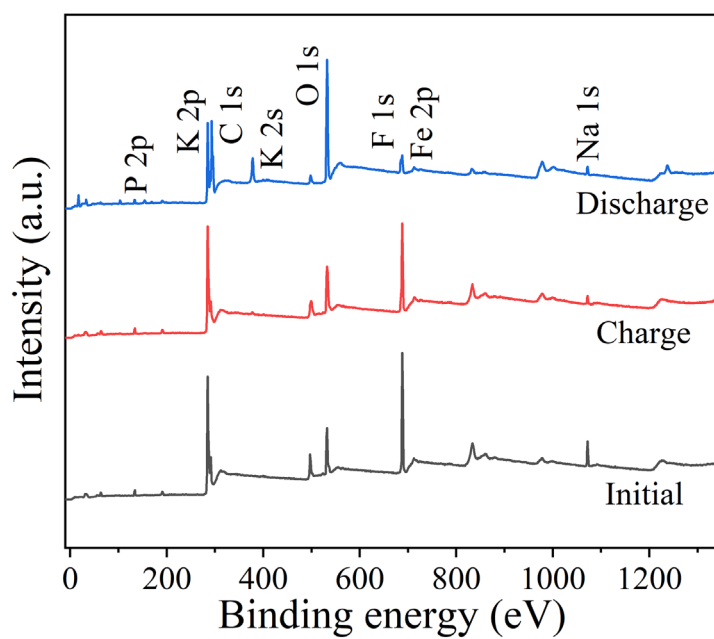

**Fig. S5.** XPS survey spectras of the initial, first charge, and first discharge of NFPP@rGO electrodes.

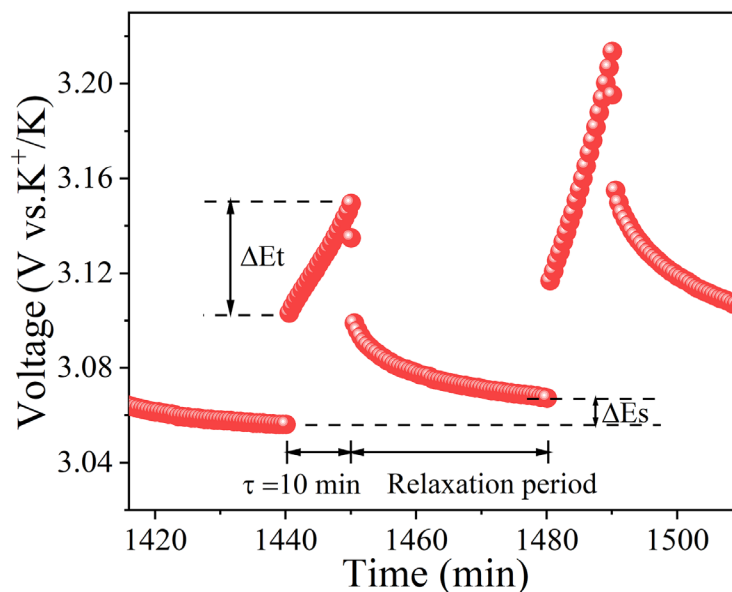

**Fig. S6.** Schematic illustration of the test steps for GITT experiment.

#### References:

1. J. Kang, H. Park, W. Ko, Y. Lee, J. Ahn, J.-K. Yoo, S. H. Song, H. Kim and J. Kim, *Journal of Materials Chemistry A*, 2021, **9**, 9898-9908.
2. I. Sultana, M. M. Rahman, S. Mateti, N. Sharma, S. Huang and Y. Chen, *Batteries & Supercaps*, 2020, **3**, 450-455.
3. J. Liao, Q. Hu, B. Che, X. Ding, F. Chen and C. Chen, *Journal of Materials Chemistry A*, 2019, **7**, 15244-15251.
4. W. B. Park, S. C. Han, C. Park, S. U. Hong, U. Han, S. P. Singh, Y. H. Jung, D. Ahn, K. S. Sohn and M. Pyo, *Advanced Energy Materials*, 2018, **8**, 1703099.
5. R. Zhang, J. Huang, W. Deng, J. Bao, Y. Pan, S. Huang and C. F. Sun, *Angewandte Chemie*, 2019, **131**, 16626-16631.
6. S. S. Fedotov, N. D. Luchinin, D. A. Aksyonov, A. V. Morozov, S. V. Ryazantsev, M. Gaboardi, J. R. Plaisier, K. J. Stevenson, A. M. Abakumov and E. V. Antipov, *Nature communications*, 2020, **11**, 1484.
